# Supplementary material
Source: PubMed Central journal article supplement (PMC6524955)
Supplement: NIHMS1008414-supplement-Supplemental_Figures.pdf [file NIHMS1008414-supplement-Supplemental_Figures.pdf]

# Supplementary Figure 1

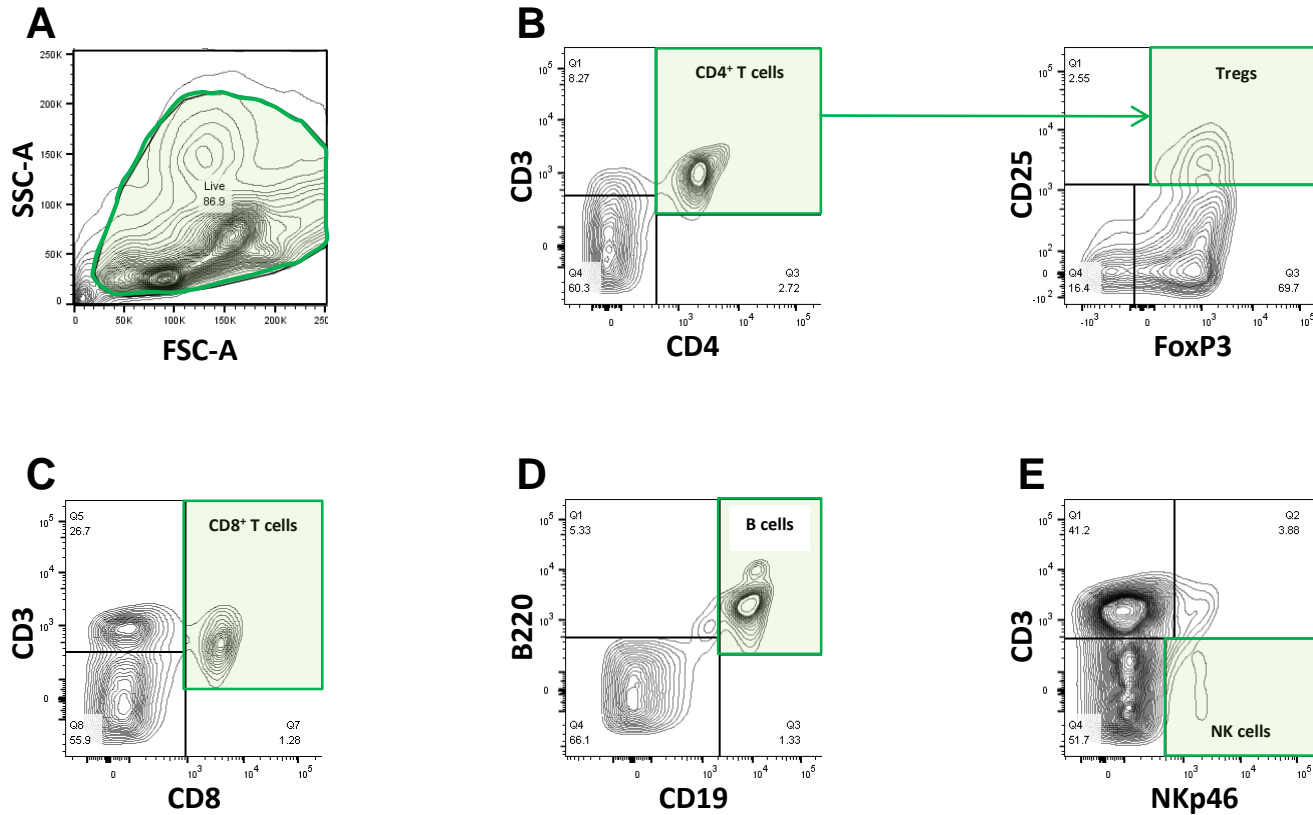

**Figure S1: Representative Flow gating for live cells and lymphocyte populations.** (A) SSC-A vs. FSC-A gating for live cells. (B) CD3<sup>+</sup>,CD4<sup>+</sup> for CD4 T cells then gated for CD25<sup>+</sup>,FoxP3<sup>+</sup> Regulatory T cells. (C) CD3<sup>+</sup>, CD8<sup>+</sup> for CD8 T cells (D) B220<sup>+</sup>, CD19<sup>+</sup> for B cells (E) CD3<sup>-</sup>, NKp46<sup>+</sup> for NK cells.

## Supplementary Figure 2

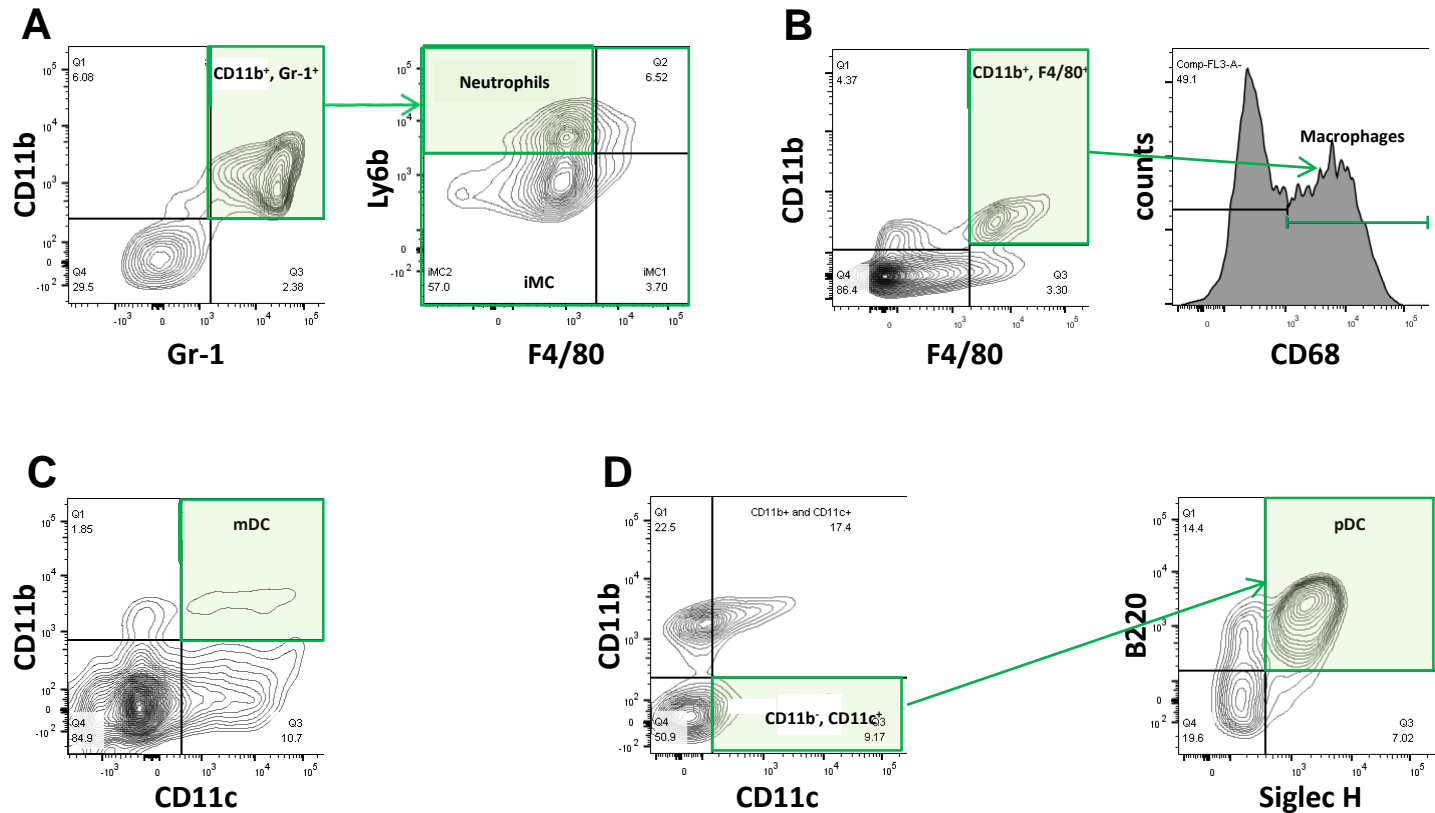

**Figure S2: Representative Flow gating for Neutrophils, Macrophages and Dendritic populations.** (A) CD11b<sup>+</sup>, GR-1<sup>+</sup> cells then gated for Ly6b<sup>+</sup>, F4/80<sup>-</sup> Neutrophils and for Ly6b<sup>-</sup>, F4/80<sup>-</sup>; Ly6b<sup>-</sup>, F4/80<sup>+</sup>; Ly6b<sup>+</sup>, F4/80<sup>+</sup> iMCs. (B) CD11b<sup>+</sup>, F4/80<sup>+</sup> cells then gated for CD68<sup>+</sup> Macrophages. (C) CD11b<sup>+</sup>, CD11c<sup>+</sup> for mDC. (D) CD11b<sup>-</sup>, CD11c<sup>+</sup> cells then gated for B220<sup>+</sup>, Siglec H<sup>+</sup> pDC.

# Supplementary Figure 3

| Source of Variation | P value |
|---------------------|---------|
| Interaction         | 0.0800  |
| Row Factor          | <0.0001 |
| Column Factor       | <0.0001 |

| Source of Variation | P value |
|---------------------|---------|
| Interaction         | <0.0001 |
| Row Factor          | 0.0001  |
| Column Factor       | <0.0001 |

| Source of Variation | P value |
|---------------------|---------|
| Interaction         | 0.1607  |
| Row Factor          | 0.0083  |
| Column Factor       | <0.0001 |

| Source of Variation | P value |
|---------------------|---------|
| Interaction         | 0.0341  |
| Row Factor          | 0.0026  |
| Column Factor       | <0.0001 |

| Source of Variation | P value |
|---------------------|---------|
| Interaction         | <0.0001 |
| Row Factor          | 0.0017  |
| Column Factor       | 0.7106  |

| Source of Variation | P value |
|---------------------|---------|
| Interaction         | 0.0003  |
| Row Factor          | 0.2491  |
| Column Factor       | <0.0001 |

| Source of Variation | P value |
|---------------------|---------|
| Interaction         | 0.0051  |
| Row Factor          | 0.0261  |
| Column Factor       | <0.0001 |

| Source of Variation | P value |
|---------------------|---------|
| Interaction         | 0.7802  |
| Row Factor          | 0.0901  |
| Column Factor       | <0.0001 |

| Source of Variation | P value |
|---------------------|---------|
| Interaction         | 0.0084  |
| Row Factor          | <0.0001 |
| Column Factor       | <0.0001 |

| Source of Variation | P value |
|---------------------|---------|
| Interaction         | <0.0001 |
| Row Factor          | <0.0001 |
| Column Factor       | 0.0001  |

| Source of Variation | P value |
|---------------------|---------|
| Interaction         | 0.0008  |
| Row Factor          | <0.0001 |
| Column Factor       | <0.0001 |

| Source of Variation | P value |
|---------------------|---------|
| Interaction         | <0.0001 |
| Row Factor          | 0.0150  |
| Column Factor       | <0.0001 |

| Source of Variation | P value |
|---------------------|---------|
| Interaction         | <0.0001 |
| Row Factor          | 0.0003  |
| Column Factor       | <0.0001 |

| Source of Variation | P value |
|---------------------|---------|
| Interaction         | 0.0170  |
| Row Factor          | 0.0025  |
| Column Factor       | <0.0001 |

| Source of Variation | P value |
|---------------------|---------|
| Interaction         | 0.5580  |
| Row Factor          | 0.0993  |
| Column Factor       | <0.0001 |

| Source of Variation | P value |
|---------------------|---------|
| Interaction         | <0.0001 |
| Row Factor          | <0.0001 |
| Column Factor       | <0.0001 |

| Source of Variation | P value |
|---------------------|---------|
| Interaction         | 0.0278  |
| Row Factor          | <0.0001 |
| Column Factor       | <0.0001 |

| Source of Variation | P value |
|---------------------|---------|
| Interaction         | 0.1121  |
| Row Factor          | 0.0024  |
| Column Factor       | <0.0001 |

| Source of Variation | P value |
|---------------------|---------|
| Interaction         | 0.2019  |
| Row Factor          | 0.0001  |
| Column Factor       | <0.0001 |

| Source of Variation | P value |
|---------------------|---------|
| Interaction         | <0.0001 |
| Row Factor          | <0.0001 |
| Column Factor       | <0.0001 |

**Figure S3: Overall statistics describing the source of variation.** (A) CD4 T cells bone. (B) CD4 T cells spleen. (C) CD8 T cells bone. (D) CD8 T cells spleen. (E) T regs bone. (F) T regs spleen. (G) B cells bone. (H) B cells spleen. (I) NK cells bone. (J) NK cells spleen. (K) iMC bone. (L) iMC spleen. (M) Macrophages bone. (N) Macrophages spleen. (O) mDC bone. (P) mDC spleen. (Q) pDC bone. (R) pDC spleen. (S) Neutrophils bone. (T) Neutrophils spleen
